# Supplementary material for: Enhancing peer support experience for patients discharged from acute psychiatric care: protocol for a randomised controlled pilot trial
Source: PubMed Central journal article supplement — BMJ Open. 2018 Aug 17;8(8):e022433. doi: 10.1136/bmjopen-2018-022433 (PMC6104746; doi:10.1136/bmjopen-2018-022433), 2018-08-17
Supplement: bmjopen-2018-022433.draft_revisions.pdf [file bmjopen-2018-022433.draft_revisions.pdf]

# BMJ Open

BMJ Open is committed to open peer review. As part of this commitment we make the peer review history of every article we publish publicly available.

When an article is published we post the peer reviewers' comments and the authors' responses online. We also post the versions of the paper that were used during peer review. These are the versions that the peer review comments apply to.

The versions of the paper that follow are the versions that were submitted during the peer review process. They are not the versions of record or the final published versions. They should not be cited or distributed as the published version of this manuscript.

BMJ Open is an open access journal and the full, final, typeset and author-corrected version of record of the manuscript is available on our site with no access controls, subscription charges or pay-per-view fees (<http://bmjopen.bmj.com>).

If you have any questions on BMJ Open's open peer review process please email [info.bmjopen@bmj.com](mailto:info.bmjopen@bmj.com)

# BMJ Open

## Enhancing peer-support experience for patients discharged from acute psychiatric care: Protocol for a randomized controlled pilot trial

|                               |                                                                                                                                                                                                                                                                                                                                                                                                                                                                                                                                                                                                                                                                                                                                                                                                                                                                                                                                                                                                                                                                                                                                                                                                                                                                                                                                                                                                                                                                                                                                                                                                                                                                                                                                                                                                                                                                                                                                                                                                                                                                                                                                                                              |
|-------------------------------|------------------------------------------------------------------------------------------------------------------------------------------------------------------------------------------------------------------------------------------------------------------------------------------------------------------------------------------------------------------------------------------------------------------------------------------------------------------------------------------------------------------------------------------------------------------------------------------------------------------------------------------------------------------------------------------------------------------------------------------------------------------------------------------------------------------------------------------------------------------------------------------------------------------------------------------------------------------------------------------------------------------------------------------------------------------------------------------------------------------------------------------------------------------------------------------------------------------------------------------------------------------------------------------------------------------------------------------------------------------------------------------------------------------------------------------------------------------------------------------------------------------------------------------------------------------------------------------------------------------------------------------------------------------------------------------------------------------------------------------------------------------------------------------------------------------------------------------------------------------------------------------------------------------------------------------------------------------------------------------------------------------------------------------------------------------------------------------------------------------------------------------------------------------------------|
| Journal:                      | <i>BMJ Open</i>                                                                                                                                                                                                                                                                                                                                                                                                                                                                                                                                                                                                                                                                                                                                                                                                                                                                                                                                                                                                                                                                                                                                                                                                                                                                                                                                                                                                                                                                                                                                                                                                                                                                                                                                                                                                                                                                                                                                                                                                                                                                                                                                                              |
| Manuscript ID                 | bmjopen-2018-022433                                                                                                                                                                                                                                                                                                                                                                                                                                                                                                                                                                                                                                                                                                                                                                                                                                                                                                                                                                                                                                                                                                                                                                                                                                                                                                                                                                                                                                                                                                                                                                                                                                                                                                                                                                                                                                                                                                                                                                                                                                                                                                                                                          |
| Article Type:                 | Protocol                                                                                                                                                                                                                                                                                                                                                                                                                                                                                                                                                                                                                                                                                                                                                                                                                                                                                                                                                                                                                                                                                                                                                                                                                                                                                                                                                                                                                                                                                                                                                                                                                                                                                                                                                                                                                                                                                                                                                                                                                                                                                                                                                                     |
| Date Submitted by the Author: | 17-Feb-2018                                                                                                                                                                                                                                                                                                                                                                                                                                                                                                                                                                                                                                                                                                                                                                                                                                                                                                                                                                                                                                                                                                                                                                                                                                                                                                                                                                                                                                                                                                                                                                                                                                                                                                                                                                                                                                                                                                                                                                                                                                                                                                                                                                  |
| Complete List of Authors:     | <p>Urichuk, Liana; Alberta Health Services, Addiction and Mental Health; University of Alberta Faculty of Medicine and Dentistry, Department of Psychiatry</p> <p>Hrabok, Marianne; Alberta Health Services, Addiction and Mental Health; University of Alberta Faculty of Medicine and Dentistry, Department of Psychiatry</p> <p>Hay, Katherine; Alberta Health Services, Addiction and Mental Health</p> <p>Spurvey, Pamela; Alberta Health Services, Addiction and Mental Health</p> <p>Sosdjan, Daniella; Alberta Health Services, Addiction and Mental Health</p> <p>Knox, Michelle; Alberta Health Services, Addiction and Mental Health</p> <p>Fu, Allen; University of Alberta Faculty of Medicine and Dentistry, Department of Psychiatry</p> <p>Surood, Shireen; Alberta Health Services, Addiction and Mental Health; University of Calgary, Faculty of Social Work</p> <p>Brown, Robert; Alberta Health Services, Addiction and Mental Health</p> <p>Coulombe, Jeff; Alberta Health Services, Addiction and Mental Health</p> <p>Kelland, Jill; Alberta Health Services, Addiction and Mental Health</p> <p>Rittenbach, Katherine; Alberta Health Services, Addiction and Mental Health; University of Alberta Faculty of Medicine and Dentistry, Department of Psychiatry</p> <p>Snaterse, Mark; Alberta Health Services, Addiction and Mental Health; University of Alberta Faculty of Medicine and Dentistry, Department of Psychiatry</p> <p>Abba-Aji, Adam; Alberta Health Services, Addiction and Mental Health; University of Alberta Faculty of Medicine and Dentistry, Department of Psychiatry</p> <p>Li, Xin-Min; University of Alberta Faculty of Medicine and Dentistry, Department of Psychiatry</p> <p>Chue, Pierre; Alberta Health Services, Addiction and Mental Health; University of Alberta Faculty of Medicine and Dentistry, Department of Psychiatry</p> <p>Greenshaw, Andrew ; University of Alberta Faculty of Medicine and Dentistry, Department of Psychiatry</p> <p>Agyapong , Vincent; Alberta Health Services, Addiction and Mental Health; University of Alberta Faculty of Medicine and Dentistry, Department of Psychiatry</p> |
| Keywords:                     | Peer support, supportive text messages, reminder text messages, randomized controlled trial                                                                                                                                                                                                                                                                                                                                                                                                                                                                                                                                                                                                                                                                                                                                                                                                                                                                                                                                                                                                                                                                                                                                                                                                                                                                                                                                                                                                                                                                                                                                                                                                                                                                                                                                                                                                                                                                                                                                                                                                                                                                                  |

1  
2  
3  
4  
5  
6  
7  
8  
9  
10  
11  
12  
13  
14  
15  
16  
17  
18  
19  
20  
21  
22  
23  
24  
25  
26  
27  
28  
29  
30  
31  
32  
33  
34  
35  
36  
37  
38  
39  
40  
41  
42  
43  
44  
45  
46  
47  
48  
49  
50  
51  
52  
53  
54  
55  
56  
57  
58  
59  
60

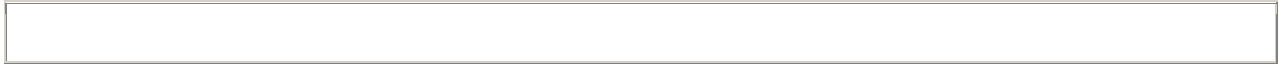

SCHOLARONE™  
Manuscripts

For peer review only

1  
2  
3 **Enhancing peer-support experience for patients discharged from acute psychiatric care: Protocol**  
4 **for a randomized controlled pilot trial**

5 Liana Urichuk<sup>1,2</sup>, Marianne Hrabok<sup>1,2</sup>, Katherine Hay<sup>1</sup>, Pamela Spurvey<sup>1</sup>, Daniella Sosdjan<sup>1</sup>, Michelle Knox<sup>1</sup>, Allen  
6 Fu<sup>2</sup>, Shireen Surood<sup>1,3</sup>, Robert Brown<sup>1</sup>, Jeff Coulombe<sup>1</sup>, Jill Kelland<sup>1</sup>, Katherine Rittenbach<sup>1,2</sup>, Mark Snaterse<sup>1,2</sup>,  
7 Adam Abba-Aji<sup>1,2</sup>, Xin-Min Li<sup>2</sup>, Pierre Chue<sup>1,2</sup>, Andrew J. Greenshaw<sup>2</sup>, Vincent I.O. Agyapong<sup>1,2\*</sup>

8  
9 <sup>1</sup>Addiction and Mental Health, Alberta Health Services, Edmonton, AB, Canada

10  
11 <sup>2</sup>Department of Psychiatry, Faculty of Medicine and Dentistry, University of Alberta, Edmonton, AB, Canada

12 <sup>3</sup>Faculty of Social Work, University of Calgary, Calgary, AB, Canada  
13

14  
15 **\*Corresponding author:**

16 Vincent Israel Opoku Agyapong

17 Department of Psychiatry, Faculty of Medicine and Dentistry, University of Alberta

18 1E1 Walter Mackenzie Health Sciences Centre (WMC), 8440 112 St NW, Edmonton, AB T6G 2B7 Canada Phone:

19 1 780 215 7771 Fax: 1 780 743 3896 Email: agyapong@ualberta.ca  
20  
21  
22  
23

24 **Word Count: 2920**  
25  
26  
27  
28  
29  
30  
31  
32  
33  
34  
35  
36  
37  
38  
39  
40  
41  
42  
43  
44  
45  
46  
47  
48  
49  
50  
51  
52  
53  
54  
55  
56  
57  
58  
59  
60

**ABSTRACT**

**Introduction:** This study will evaluate the effectiveness of an innovative peer support program. The program incorporates leadership training, mentorship, recognition, and reward systems for peer support workers, and supportive/reminder text messaging for patients discharged from acute (hospital) care. We hypothesize that patients enrolled in the peer support system plus daily supportive/reminder text messages condition will achieve superior outcomes in comparison to other groups.

**Methods and analysis:** This is a prospective, rater-blinded, four arm randomized controlled trial. 180 patients discharged from acute psychiatric care in Edmonton, Alberta, Canada will be randomized to one of four conditions: treatment as usual follow-up care, daily supportive/reminder text messages, enrollment in a peer support system, or enrollment in a peer support system plus daily supportive/reminder text messages. Patients in each group will complete evaluation measures (e.g., recovery, general symptomatology, and functional outcomes) at baseline, six months, and twelve months. Patient service utilization data and clinician rated measures will also be used to gauge patient progress. Patient data will be analyzed using descriptive statistics, repeated measures, and correlational analyses. The peer support worker experience will be captured using qualitative methods.

**Ethics and dissemination:** The study will be conducted in accordance with the Declaration of Helsinki (Hong Kong Amendment) and Good Clinical Practice (Canadian Guidelines). The study will receive ethical clearance from an approved Health Ethics Research Board and operational approval from our regional health authority prior to proceeding. All participants will provide informed consent prior to study inclusion. The results will be disseminated at several levels, including patients/peer supports, practitioners, academics/researchers, and healthcare organizations.

**Registration details:** clinicaltrials.gov: NCT03404882

## INTRODUCTION

### Background and Rationale

Peer support is emotional, social and practical help provided by non-professionals to assist people with sustaining health behaviours[1]. Effective peer support workers share a similar condition as patients, are currently managing their condition effectively, and have received training to provide support[2]. Peer support can be provided to people with either psychological or non-psychological health complaints by peer support workers with ‘lived’ experience, and the position of peer support worker may include activities such as advocacy, connecting patients with resources, and experiential sharing, among others[3].

Peer support is consistent with the recovery paradigm in mental health[4], and is differentiated from psychiatric models of traditional diagnosis and treatment. The purported mechanisms through which peer support may function[2] are through experiential knowledge sharing, modeling of adaptive coping strategies, social comparison, and enhancing social support. Moreover, peer support may be particularly useful for patients who have difficulty engaging in conventional services[1]. It may be the case that peer support systems can serve as an entry point into the healthcare system for ‘hardly reached’ individuals and at the very least, serve as a means of providing supportive services for those who would otherwise not engage in treatment. In addition, providing peer support may offer benefits to the peer supporter worker, by enhancing feelings of competence and personal value[2].

Peer support is valued in recovery-oriented models[4] of mental health and is becoming increasingly implemented organizationally (see Myrick and del Vecchio[5] for a discussion). Many studies have reported positive effects of peer support, including lower inpatient service use, better relationships with providers, and increased engagement (for review, see Chinman et al.[6]). However, a recent rigorous evaluation of randomized controlled trials (RCTs)[7] of peer support studies reported that outcomes were generally mixed and often non-significant. In their review, the authors noted a high degree of bias and methodological limitations in the studies they reviewed, and concluded that “peer support programmes should be implemented within the context of high quality research projects wherever possible”.

In addition to methodological improvements needed for research on peer support, there is a need to further develop the peer support workforce. Identified areas of development for peer support programs include[8]: how to define “peerness”, role clarity and integration with existing systems, credentialing, and workforce development (see also Myrick and del Vecchio[5]). Within our local context, in the province of Alberta, Canada, peer support for patients has been in existence for many years. Anecdotal evidence suggests there is low uptake (i.e., a number of programs employing peer support workers and difficulty recruiting to available positions) and high attrition for peer support worker roles within the province. There has been a drive to develop curricula and organizational infrastructure to formally train and support peer support workers. Administrators who have worked with peer support workers suggest the lack of adequate incentives may contribute to peer support workforce challenges. Similarly, there are often limited incentives for mental health professionals to provide supervision and mentorship for peer support workers.

In summary, the existing literature suggests there is opportunity for innovation in peer support programs, and there is a need for rigorous methodology to better evaluate outcomes from peer support programs. There is also a need to further develop the peer support workforce. The current paper describes a randomized controlled trial that is designed to systematically evaluate a novel peer support model termed the “Edmonton Peer Support System” (EPSS), which incorporates innovative features of service delivery (i.e., an incentive-based model of training, text messaging) and rigorous methodological design to minimize bias and confounds (e.g., comprehensive measures of outcome; methodological design features including longitudinal, prospective, four arm parallel design, and rater-blinding).

One of the innovative features of this study is the incorporation of text messaging. Text messaging is a relatively low cost, high impact, and easily scalable program that uses existing technology, is devoid of geographic barriers, and is easily accessible to end users. There is evidence that supportive text messaging demonstrates positive effects in terms of symptom improvement and patient satisfaction. For example, patients with depression and comorbid alcohol use disorder showed significantly lower

1  
2  
3 depressive symptoms on standardized self-report than a similar patient group who did not receive  
4 messages (large effect size[9]). A second randomized trial demonstrated similar results (Cohen's  
5  $d=0.67$ [10]). In terms of satisfaction, over 80% of subscribers reported that a texting program improved  
6 their mental health[11][12].

7  
8 There is also evidence that reminder text messaging improves appointment attendance rates. For  
9 example, in a systematic review and meta-analysis of eight randomized controlled trials involving 6615  
10 participants[13], the authors found moderate quality evidence from seven studies (5841 participants) that  
11 mobile text message reminders improved the rate of attendance at healthcare appointments compared to  
12 no reminders [risk ratio (RR) 1.14 (95% confidence interval (CI) 1.03 to 1.26)]. They also found that text  
13 messaging reminders were similar to telephone reminders in terms of their effect on attendance rates, yet  
14 cost less than telephone reminders.

15 Another innovative feature of this study is the incorporation of a peer support incentive system.  
16 As discussed, the peer support workforce has been identified as an area in need of development[5],  
17 including role clarity, integration with healthcare professionals, and credentialing[8]. Specifically, a lack  
18 of a "career ladder" or a clear movement within positions of peer support work has been identified[8],  
19 with movement possible laterally (but not upward) within many program structures. In this project, peer  
20 support workers will participate in an incentive based system that formally recognizes performance. The  
21 EPSS is structured as follows:

- 22 • Peer support workers are people with 'lived' mental health and substance abuse experience who  
23 are at a point in their personal recovery where they consistently demonstrate the ability to share  
24 their individual story in a manner that inspires hope and builds relationships with others. Peer  
25 support workers who are employed by Alberta Health Services (AHS), our provincial health  
26 authority, will be invited to enroll as foundational members of the EPSS.
- 27 • Members will be provided with formalized training developed within our health region, involving  
28 knowledge training, practice, and ongoing meetings throughout the program to assist peer support  
29 workers in adhering to principles consistent with a peer support framework and recovery  
30 philosophy and problem-solving concerns or challenges that may arise. Peer support workers will  
31 receive clinical support/mentorship from mental health therapists.
- 32 • Patient beneficiaries of EPSS will receive supportive face-to-face visits, phone calls, and  
33 interactive text message support from their peer support workers. They will also receive reminder  
34 text messages for their appointments.
- 35 • Patient beneficiaries will be enrolled as associate members of the EPSS and will be provided with  
36 training to act as peer support workers when they are at an advanced stage in their recovery. At  
37 this time, they can apply for AHS peer support worker roles as available.
- 38 • Contributions of peer support workers will be recognized via attainment of different levels of  
39 membership (e.g. "star" levels) and certificates of recognition (bearing logos of collaborating  
40 institutions) at formal ceremonies. Star-level recognition will be categorized into: Silver Star  
41 Memberships (five stars), Gold Star Memberships (ten stars), and Star Fellowships (twenty stars).
- 42 • Contributions of mental health therapists towards supporting/mentoring peer support workers will  
43 also be recognized through star memberships and certificates at formal ceremonies.

44  
45  
46  
47 The hope of EPSS is to increase compassion and decrease stigma, foster multi-disciplinary teamwork,  
48 incorporate client/caregiver experiences, and strengthen service provider skills and abilities. Our proposed  
49 EPSS will provide training for those with mental health challenges that will enable them to contribute to  
50 providing compassionate care for mental health patients. This program philosophy is aligned with  
51 regional goals relating to improvement of mental health services in our province[14].  
52  
53  
54  
55  
56  
57  
58  
59  
60

## Aim and Objectives

The aim of the project is to evaluate the effectiveness of the EPSS. The patient outcomes are organized according to: recovery variables (e.g., recovery, stigma), functional variables (quality of life, employment), symptom variables (psychological symptoms, general outcomes), and service variables (e.g., health service utilization, cost, satisfaction), as further described in *Methods and Analysis*. Peer support worker outcomes will also be evaluated, including effectiveness, job satisfaction, acceptability, and recovery.

The objectives of the project include:

1. To compare mean changes in recovery, functional outcomes, clinical symptoms, and service variables after six, and 12 months for patients in each of the four arms: treatment as usual follow-up care, daily supportive/reminder text messages, enrollment in a peer support system, or enrollment in a peer support system plus daily supportive/reminder text messages.
2. To assess job satisfaction, acceptability, and recovery of peer support workers at six and 12 months.
3. To assess job satisfaction among mental health therapists offering support and mentorship for peer support workers.

## Hypothesis

We hypothesize that patients enrolled in the peer support system plus daily supportive/reminder text messages will achieve superior outcomes compared to other conditions on each outcome measure used. In turn, patients enrolled in peer support only arm and those enrolled in the daily supportive text message only arm will have superior outcomes to those enrolled in the treatment as usual arm.

## METHODS AND ANALYSIS

### Overview of Study Design, Timeline, and Participant Selection

This will be a longitudinal, prospective, parallel design, four arm, rater-blinded randomized clinical trial with a recruitment period of six months and an observation period of 12 months for each participant. Table 1 provides an overview of the timeline for the project. The research will be carried out in Addiction and Mental Health clinics in a large, socio-demographically diverse[15] city in Western Canada (Edmonton, Alberta).

Patients who are 18 to 65 years of age, able to provide informed written consent, have been diagnosed with a chronic mental health condition, and are ready for discharge from an acute care facility within the Edmonton Zone with community mental health follow-up will be invited to participate. Patients must have a mobile handset capable of receiving text messages. Mobile phones and a call credit of up to 10 dollars monthly will be provided to those who satisfy the inclusion criteria but do not have mobile phones. Patients will be ineligible if they do not meet the above inclusion criteria, if they have an addiction disorder but not a mental health diagnosis, are not capable of reading text messages from a mobile device, or will be out of town during the 12 month follow-up period. Patients are also ineligible if they do not consent to take part in the study.



Table 1  
Gantt Chart Timeline

| Milestone No.                                                                                                                            | Milestones                                                                                                                                                               | Year 1              |    |    |    | Year 2              |    |    |    |
|------------------------------------------------------------------------------------------------------------------------------------------|--------------------------------------------------------------------------------------------------------------------------------------------------------------------------|---------------------|----|----|----|---------------------|----|----|----|
|                                                                                                                                          |                                                                                                                                                                          | Start Date-End Date |    |    |    | Start Date-End Date |    |    |    |
|                                                                                                                                          |                                                                                                                                                                          | Q1                  | Q2 | Q3 | Q4 | Q1                  | Q2 | Q3 | Q4 |
| <b>Milestone 1: Recruiting and training of peer support workers and trainee in psychiatry</b>                                            |                                                                                                                                                                          |                     |    |    |    |                     |    |    |    |
| 1.1                                                                                                                                      | Advertising and assembling of peer support workers and recruitment of trainee in psychiatry (the latter will support the research/evaluation components of the project). |                     |    |    |    |                     |    |    |    |
| 1.2                                                                                                                                      | Training of peer support workers and the trainee in psychiatry                                                                                                           |                     |    |    |    |                     |    |    |    |
| 1.3                                                                                                                                      | Writing up a bank supportive text messages in collaboration with service users and mental health therapists                                                              |                     |    |    |    |                     |    |    |    |
| <b>Milestone 2: The recruitment of study participants</b>                                                                                |                                                                                                                                                                          |                     |    |    |    |                     |    |    |    |
| 2.1                                                                                                                                      | Recruitment, baseline assessment, randomization                                                                                                                          |                     |    |    |    |                     |    |    |    |
| 2.2                                                                                                                                      | Assignment into one of the three arms of the study                                                                                                                       |                     |    |    |    |                     |    |    |    |
| 2.3                                                                                                                                      | Provision of peer support and delivery of supportive text messages to participants in two arms of the study except the usual care group                                  |                     |    |    |    |                     |    |    |    |
| <b>Milestone 3: Follow-up assessment of study participants and collection of administrative data</b>                                     |                                                                                                                                                                          |                     |    |    |    |                     |    |    |    |
| 3.1                                                                                                                                      | Follow-up assessments of individual study participants (Excluding satisfaction surveys)                                                                                  |                     |    |    |    |                     |    |    |    |
| 3.2                                                                                                                                      | Follow-up satisfaction survey of participants all groups                                                                                                                 |                     |    |    |    |                     |    |    |    |
| 3.3                                                                                                                                      | Collection of administrative data related to health services utilization                                                                                                 |                     |    |    |    |                     |    |    |    |
| <b>Milestone 4: Data compilation, analysis and preparation of reports, publications, and presentations for multi-scale dissemination</b> |                                                                                                                                                                          |                     |    |    |    |                     |    |    |    |
| 4.1                                                                                                                                      | Data compilation                                                                                                                                                         |                     |    |    |    |                     |    |    |    |
| 4.2                                                                                                                                      | Data analysis                                                                                                                                                            |                     |    |    |    |                     |    |    |    |
| 4.3                                                                                                                                      | Preparation of reports, publications and presentations                                                                                                                   |                     |    |    |    |                     |    |    |    |

## Interventions

Each of the four intervention arms will be randomly assigned. In the text messaging plus peer support condition, patients will be assigned a peer support worker who will visit them during the last week of their inpatient stay to introduce themselves and build rapport before patients are discharged into the community. The peer support workers will visit the participants up to eight times over a six month period. The peer support workers will offer the opportunity for interactive text message support for six months. In addition to peer support, participants in this arm of the study will receive daily supportive text messages from an automated online application and reminder text messages for their community clinic/program appointments.

Patients in the peer support only arm of the study will be assigned a peer support worker before they are discharged (as described above) and will receive up to eight visits over a six month period, in addition to whatever community clinic/program treatment options they are provided.

Patients in the supportive text message only arm of the study will receive daily supportive text messages from an automated online application and reminder text messages for their community clinic/program appointments.

Patients in the control arm of the study will receive the usual follow-up appointment offered to all patients who are discharged from acute care. They may also be offered a range of community clinic/program treatment options. However, they will not receive peer support or supportive/reminder text messages.

## Sample Size

Consistent with the idea that this is a pilot study, the research will utilize data that can be elicited from participants who can be enrolled within existing operational resources. The study will therefore be limited to a sample size of 180, with about 45 patients recruited into each arm of the study. Patients transitioning from acute care are vulnerable to insufficient service follow-up post-discharge, and it can reasonably be expected that only a small number of eligible participants will enroll in and complete the study.

## Outcomes

Outcome measures and time points are detailed in Tables 2 and 3, and follow from the aim and objectives of the study. All measures (with the exception of patient experience questionnaire, interviews, and data extraction) are objective measures with published information regarding reliability and validity.

Table 2  
Patient-Oriented Outcome Measures

|                     | Construct                         | Tool                                                                         | Rater      | Time Required    | Timepoints assessed |          |           |
|---------------------|-----------------------------------|------------------------------------------------------------------------------|------------|------------------|---------------------|----------|-----------|
|                     |                                   |                                                                              |            |                  | Baseline            | 6 months | 12 months |
| Recovery variables  | Recovery                          | Recovery Assessment Scale [16]                                               | Patient    | 5 min            | X                   | X        | X         |
|                     | Stigma                            | Perceived Discrimination Scale[17]                                           | Patient    | 5 min            | X                   | X        | X         |
| Functional variable | Quality of Life                   | WHOQOL-BREF (World Health Organization Quality of Life Brief instrument)[18] | Patient    | 10 min           | X                   | X        | X         |
|                     | Employment                        | Employed <sup>1</sup> yes/no                                                 | Patient    | 1 min            | X                   | X        | X         |
| Symptom variables   | Overall Outcomes                  | HoNOS (Health of Nations Outcome Scale)[19]                                  | Clinician  | 5 min            | X                   | X        | X         |
|                     | Overall Symptoms                  | BASIS-32 (Behavior and Symptom Identification Scale)[20]                     | Patient    | 10 min           | X                   | X        | X         |
| Service variables   | Health utilization                | Data extraction and analysis <sup>2</sup>                                    | Researcher | -                |                     |          | X         |
|                     | Health services cost              | Costs of above services                                                      | Researcher | -                |                     |          | X         |
|                     | Patient satisfaction with service | Patient Satisfaction/Experience Questionnaire                                | Patient    | 5 min            |                     | X        | X         |
| <b>Total Time</b>   |                                   |                                                                              |            | <b>Client</b>    | ~30 min             | ~35 min  | ~35 min   |
|                     |                                   |                                                                              |            | <b>Clinician</b> | ~5 min              | ~5 min   | ~5 min    |

<sup>1</sup> e.g., paid full time, paid part time, self-employed, paid casual, temporary or contract work, unemployed, volunteering.

<sup>2</sup> e.g., rates of use, inpatient admissions and length of stay, readmissions, completed appointments, Emergency Department presentations, Emergency Medical Services use, community services appointments, crisis and urgent service calls, no show rates.

Table 3  
Peer Support Worker-Oriented Outcome Measures

| Construct         | Instrument                                                                                                        | Rater                               | Time required | Timepoints assessed        |          |           |        |
|-------------------|-------------------------------------------------------------------------------------------------------------------|-------------------------------------|---------------|----------------------------|----------|-----------|--------|
|                   |                                                                                                                   |                                     |               | Baseline                   | 6 months | 12 months |        |
| Effectiveness     | Interview (part a) <sup>1</sup>                                                                                   | Researcher with peer support worker | 10 min<br>-   |                            |          | X         |        |
|                   | Data extraction and analysis, including: number of texts sent, number of visits provided per patient <sup>2</sup> | Researcher                          |               |                            | X        | X         |        |
| Job satisfaction  | Interview (part b) <sup>1</sup>                                                                                   | Researcher with peer support worker | 5 min         |                            | X        | X         |        |
| Acceptability     | Interview (part b) <sup>1</sup>                                                                                   | Researcher with peer support worker | 10 min        |                            | X        | X         |        |
| Recovery          | Recovery Assessment Scale[16]                                                                                     | Peer support worker                 | 5 min         | X                          | X        | X         |        |
| <b>Total Time</b> |                                                                                                                   |                                     |               |                            |          |           |        |
|                   |                                                                                                                   |                                     |               | <b>Peer Support Worker</b> | 5 min    | 20 min    | 30 min |

<sup>1</sup> Includes questions regarding: amount of on the job training; frequency and type of activities and support (received and given); perceptions of accountability, empowerment, self-confidence, self-awareness, self-esteem; satisfaction with support received; role clarity; personal well-being; levels of comfort, and team integration.

<sup>2</sup> e.g., number of text messages sent to/received by each patient, number of peer support visits per patient, peer support worked attrition rates (pre- and post-)

The two symptom variables (HoNOS and Basis-32) will be the primary outcomes and all other measures will be secondary outcomes.

### Randomization and Blinding

Randomization will be stratified by primary mental health diagnoses (mood or psychotic disorder) using permuted blocks to ensure balance (1:1:1:1) between the four follow-up community treatment groups. The randomization codes will be transmitted by an independent statistician via text message directly to a researcher's password-protected phone line with a secure online backup. This will commence as soon as participants sign the consent forms.

Because it will not be possible for participants to be blinded, treatment allocation will be made explicit to them as soon as randomization is concluded. Outcome assessors will be blinded to treatment group allocation by not involving them in discussions about study participants and not granting them access to the database which contains the randomization code. In addition, study participants will be asked not to reveal their treatment allocation to their assessor. Moreover, these assessors will not be involved in data analysis. To test the success of blinding we will ask the assessor to guess the treatment group for each participant at six and 12 month follow-up. After data collection is complete all data will undergo a blind review for the purposes of finalizing the planned analysis.

### Follow-up Assessment

At six and 12 months, a blinded researcher will contact all study participants and assist them in completing a range of assessment tools relating to the primary and secondary outcome measures. At 12 months, data related to each participant's clinic/program attendance rates and utilization of health services

1  
2  
3 will be compiled from administrative records by the blinded researcher. A researcher will also contact  
4 peer supporters and mental health therapists providing support/mentorship for peer support workers at 6  
5 and 12 months to complete exploratory outcome measures.  
6

### 7 **Statistical Methods**

8 The primary goal of the statistical analysis will be to produce summary descriptive statistics for  
9 the longitudinal data, which will provide estimates for future sample size calculations and enable  
10 calculation of effect size. Another goal will be to estimate the variability between the results and what has  
11 been stated by our hypothesis for the full study to represent a clinically meaningful difference between the  
12 intervention and control groups. The data will be analyzed using repeated measures and effect size  
13 analyses, and correlational analyses will be completed between measures at each time point. The results  
14 of this study will guide the design for a future, more highly powered, study.  
15

### 16 **ETHICS AND DISSEMINATION**

17 The study will be conducted in accordance with the Declaration of Helsinki (Hong Kong  
18 Amendment)[21] and Good Clinical Practice (Canadian Guidelines)[22]. The study will receive ethical  
19 clearance from the Health Ethics Research Board of the University of Alberta and operational approval  
20 from our regional health authority (Alberta Health Services) prior to proceeding. The study is registered  
21 with clinicaltrials.gov: NCT03404882. All participants will provide informed consent prior to study  
22 inclusion.  
23

24 The results of the study are expected to be available within 21 months of project commencement.  
25 We intend to disseminate the research findings at several levels, including patients/peer supports,  
26 practitioners, academics/researchers, and healthcare organizations. Patients involved with the research  
27 will be invited to help develop key messages arising from the work and help to determine the format and  
28 modality for dissemination of findings. We will utilize existing communication channels within our  
29 health authority to disseminate findings to clinicians. We will disseminate findings to academics and  
30 researchers through peer-reviewed journals and provincial, national and international academic forums.  
31

### 32 **DISCUSSION**

33 The results of the study will provide important information with respect to: a comprehensive  
34 evaluation of outcomes of peer support; comparability of peer support compared to care as usual; impact  
35 of a text messaging in addition to care; and impact of a novel, incentive-based peer support training  
36 system. The results of the pilot trial will also inform the implementation of a multicenter clinical trial  
37 which may be necessary to validate our study findings. Given the increasing implementation of peer  
38 support programs within service organizations, the results of this study will be useful for administrators  
39 and clinicians who are interested in incorporating peer support services into existing care.  
40

41 Although this is a pilot trial, the highest quality design was chosen to evaluate the EPSS. We  
42 therefore expect that the pilot findings will inform and support administrative decision-making with  
43 respect to further scaling and studying the intervention within the province of Alberta and beyond. Thus,  
44 we will plan an organizational engagement strategy to advance discussions about feasibility and  
45 effectiveness prior to the conclusion of the trial. This will help ensure the findings are a relevant part of  
46 decision-making processes in a way that is aligned with study findings as they emerge. This may facilitate  
47 planning of a larger study that is endorsed at both leadership and operational levels, so that the potential  
48 impact of the intervention can reach patients in a more timely fashion.  
49

50  
51  
52  
53 **Authors' Contributions:** Drs. Urichuk, Agyapong, Hrabok, and Ms. Hay contributed to the study design  
54 and writing of the manuscript. The other authors contributed to the study design and critically reviewed  
55 the manuscript.  
56

**Funding Statement:** This work was supported by the Douglas Harding Trust (via Department of Psychiatry, University of Alberta) and support was received from Alberta Health Services.

**Competing Interests Statement:** Dr. Hrabok receives royalties from Oxford University Press. The other authors have nothing to disclose.

## REFERENCES

- 1 Sokol R, Fisher E. Peer Support for the Hardly Reached: A Systematic Review. *Am J Public Health Ajph* Published Online First: 2016. <https://ajph.aphapublications.org/doi/full/10.2105/AJPH.2016.303180> (accessed 24 Aug 2017).
- 2 Proudfoot JG, Jayawant A, Whitton AE, *et al.* Mechanisms underpinning effective peer support: a qualitative analysis of interactions between expert peers and patients newly-diagnosed with bipolar disorder. *BMC Psychiatry* 2012;**12**:196.
- 3 Jacobson N, Trojanowski L, Dewa CS. What do peer support workers do? A job description. *BMC Health Serv Res* 2012;**12**:205.
- 4 Onken SJ, Craig CM, Ridgway P, *et al.* An analysis of the definitions and elements of recovery: A review of the literature. *Psychiatr Rehabil J* 2007;**31**:9–22. doi:10.2975/31.1.2007.9.22
- 5 Myrick K, del Vecchio P. Peer support services in the behavioral healthcare workforce: State of the field. *Psychiatr Rehabil J* 2016;**39**:197–203. doi:10.1037/prj0000188
- 6 Chinman M, George P, Dougherty RH, *et al.* Peer support services for individuals with serious mental illnesses: assessing the evidence. *Psychiatr Serv Wash DC* 2014;**65**:429–41. doi:10.1176/appi.ps.201300244
- 7 Lloyd-Evans B, Mayo-Wilson E, Harrison B, *et al.* A systematic review and meta-analysis of randomised controlled trials of peer support for people with severe mental illness. *BMC Psychiatry* 2014;**14**. doi:10.1186/1471-244X-14-39
- 8 Silver J, Nemeč PB. The role of the peer specialists: Unanswered questions. *Psychiatr Rehabil J* 2016;**39**:289–91. doi:10.1037/prj0000216
- 9 Agyapong VIO, Ahern S, McLoughlin DM, *et al.* Supportive text messaging for depression and comorbid alcohol use disorder: single-blind randomised trial. *J Affect Disord* 2012;**141**:168–76. doi:10.1016/j.jad.2012.02.040
- 10 Agyapong VIO, Juhás M, Ohinmaa A, *et al.* Randomized controlled pilot trial of supportive text messages for patients with depression. *BMC Psychiatry* 2017;**17**:286. doi:10.1186/s12888-017-1448-2
- 11 Agyapong VIO, McLoughlin DM, Farren CK. Six-months outcomes of a randomised trial of supportive text messaging for depression and comorbid alcohol use disorder. *J Affect Disord* 2013;**151**:100–4. doi:10.1016/j.jad.2013.05.058

- 12 Agyapong VIO, Mrklas K, Juhás M, *et al.* Cross-sectional survey evaluating Text4Mood: mobile health program to reduce psychological treatment gap in mental healthcare in Alberta through daily supportive text messages. *BMC Psychiatry* 2016;**16**. doi:10.1186/s12888-016-1104-2
- 13 Gurol-Urganci I, de Jongh T, Vodopivec-Jamsek V, *et al.* Mobile phone messaging reminders for attendance at healthcare appointments. *Cochrane Database Syst Rev* 2013;:CD007458. doi:10.1002/14651858.CD007458.pub3
- 14 Alberta AH-G of. Valuing mental health: Next steps: Alberta Health website. <http://www.health.alberta.ca/initiatives/Mental-Health-Review.html> (accessed 3 Jan 2018).
- 15 Edmonton C of. 2016 Municipal Census Results. 2017. [https://www.edmonton.ca/city\\_government/facts\\_figures/municipal-census-results.aspx](https://www.edmonton.ca/city_government/facts_figures/municipal-census-results.aspx) (accessed 14 Sep 2017).
- 16 Giffort D, Schmook A, Woody C, *et al.* Recovery Assessment Scale. 1995.
- 17 Major B, O'Brien LT. The Social Psychology of Stigma. *Annu Rev Psychol* 2005;**56**:393–421. doi:10.1146/annurev.psych.56.091103.070137
- 18 Skevington SM, Lotfy M, O'Connell KA. The World Health Organization's WHOQOL-BREF quality of life assessment: Psychometric properties and results of the international field trial. A Report from the WHOQOL Group. *Qual Life Res* 2004;**13**:299–310. doi:10.1023/B:QURE.0000018486.91360.00
- 19 What is HoNOS?  
<http://www.rcpsych.ac.uk/traininpsychiatry/conferencetraining/resources/honos/whatishonos.aspx> (accessed 4 Jan 2018).
- 20 Eisen SV, Normand S-L, Belanger AJ, *et al.* The Revised Behavior and Symptom Identification Scale (BASIS-R): reliability and validity. *Med Care* 2004;**42**:1230–41.
- 21 World Medical Association. World Medical Association Declaration of Helsinki: ethical principles for medical research involving human subjects. *JAMA* 2013;**310**:2191–4. doi:10.1001/jama.2013.281053
- 22 Guidelines for Good Clinical Practice (GCP) for Trials on Pharmaceutical Products. WHO Technical Report Series, No. 850, Annex 3 - WHO Expert Committee on Selection and Use of Essential Medicines, Sixth Report, 1993. <http://apps.who.int/medicinedocs/en/d/Jwhozip13e/> (accessed 22 Nov 2017).

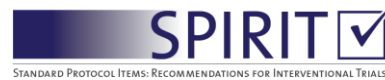

SPIRIT 2013 Checklist: Recommended items to address in a clinical trial protocol and related documents\*

| Section/item                      | Item No | Description                                                                                                                                                                                                                                                                              | Addressed on page number |
|-----------------------------------|---------|------------------------------------------------------------------------------------------------------------------------------------------------------------------------------------------------------------------------------------------------------------------------------------------|--------------------------|
| <b>Administrative information</b> |         |                                                                                                                                                                                                                                                                                          |                          |
| Title                             | 1       | Descriptive title identifying the study design, population, interventions, and, if applicable, trial acronym                                                                                                                                                                             | ___1___                  |
| Trial registration                | 2a      | Trial identifier and registry name. If not yet registered, name of intended registry                                                                                                                                                                                                     | ___1___                  |
|                                   | 2b      | All items from the World Health Organization Trial Registration Data Set                                                                                                                                                                                                                 | ___N/A___                |
| Protocol version                  | 3       | Date and version identifier                                                                                                                                                                                                                                                              | ___N/A___                |
| Funding                           | 4       | Sources and types of financial, material, and other support                                                                                                                                                                                                                              | ___11___                 |
| Roles and responsibilities        | 5a      | Names, affiliations, and roles of protocol contributors                                                                                                                                                                                                                                  | ___1___                  |
|                                   | 5b      | Name and contact information for the trial sponsor                                                                                                                                                                                                                                       | ___11___                 |
|                                   | 5c      | Role of study sponsor and funders, if any, in study design; collection, management, analysis, and interpretation of data; writing of the report; and the decision to submit the report for publication, including whether they will have ultimate authority over any of these activities | ___11___                 |
|                                   | 5d      | Composition, roles, and responsibilities of the coordinating centre, steering committee, endpoint adjudication committee, data management team, and other individuals or groups overseeing the trial, if applicable (see Item 21a for data monitoring committee)                         | ___N/A___                |



|    |                                                           |     |                                                                                                               |               |
|----|-----------------------------------------------------------|-----|---------------------------------------------------------------------------------------------------------------|---------------|
| 1  | <b>Introduction</b>                                       |     |                                                                                                               |               |
| 2  |                                                           |     |                                                                                                               |               |
| 3  | Background and                                            | 6a  | Description of research question and justification for undertaking the trial, including summary of relevant   | _____2-5_____ |
| 4  | rationale                                                 |     | studies (published and unpublished) examining benefits and harms for each intervention                        |               |
| 5  |                                                           |     |                                                                                                               |               |
| 6  |                                                           | 6b  | Explanation for choice of comparators                                                                         | _____7_____   |
| 7  |                                                           |     |                                                                                                               |               |
| 8  | Objectives                                                | 7   | Specific objectives or hypotheses                                                                             | _____5_____   |
| 9  |                                                           |     |                                                                                                               |               |
| 10 | Trial design                                              | 8   | Description of trial design including type of trial (eg, parallel group, crossover, factorial, single group), |               |
| 11 |                                                           |     | allocation ratio, and framework (eg, superiority, equivalence, noninferiority, exploratory)                   | _____5_____   |
| 12 |                                                           |     |                                                                                                               |               |
| 13 |                                                           |     |                                                                                                               |               |
| 14 | <b>Methods: Participants, interventions, and outcomes</b> |     |                                                                                                               |               |
| 15 |                                                           |     |                                                                                                               |               |
| 16 | Study setting                                             | 9   | Description of study settings (eg, community clinic, academic hospital) and list of countries where data will | _____5_____   |
| 17 |                                                           |     | be collected. Reference to where list of study sites can be obtained                                          |               |
| 18 |                                                           |     |                                                                                                               |               |
| 19 | Eligibility criteria                                      | 10  | Inclusion and exclusion criteria for participants. If applicable, eligibility criteria for study centres and  | _____5_____   |
| 20 |                                                           |     | individuals who will perform the interventions (eg, surgeons, psychotherapists)                               |               |
| 21 |                                                           |     |                                                                                                               |               |
| 22 | Interventions                                             | 11a | Interventions for each group with sufficient detail to allow replication, including how and when they will be | _____7_____   |
| 23 |                                                           |     | administered                                                                                                  |               |
| 24 |                                                           |     |                                                                                                               |               |
| 25 |                                                           | 11b | Criteria for discontinuing or modifying allocated interventions for a given trial participant (eg, drug dose  | _____N/A_____ |
| 26 |                                                           |     | change in response to harms, participant request, or improving/worsening disease)                             |               |
| 27 |                                                           |     |                                                                                                               |               |
| 28 |                                                           | 11c | Strategies to improve adherence to intervention protocols, and any procedures for monitoring adherence        | _____9_____   |
| 29 |                                                           |     | (eg, drug tablet return, laboratory tests)                                                                    |               |
| 30 |                                                           |     |                                                                                                               |               |
| 31 |                                                           | 11d | Relevant concomitant care and interventions that are permitted or prohibited during the trial                 | _____N/A_____ |
| 32 |                                                           |     |                                                                                                               |               |
| 33 | Outcomes                                                  | 12  | Primary, secondary, and other outcomes, including the specific measurement variable (eg, systolic blood       | _____7-9_____ |
| 34 |                                                           |     | pressure), analysis metric (eg, change from baseline, final value, time to event), method of aggregation (eg, |               |
| 35 |                                                           |     | median, proportion), and time point for each outcome. Explanation of the clinical relevance of chosen         |               |
| 36 |                                                           |     | efficacy and harm outcomes is strongly recommended                                                            |               |
| 37 |                                                           |     |                                                                                                               |               |
| 38 | Participant timeline                                      | 13  | Time schedule of enrolment, interventions (including any run-ins and washouts), assessments, and visits for   | _____7-9_____ |
| 39 |                                                           |     | participants. A schematic diagram is highly recommended (see Figure)                                          |               |
| 40 |                                                           |     |                                                                                                               |               |
| 41 |                                                           |     |                                                                                                               |               |
| 42 |                                                           |     |                                                                                                               |               |
| 43 |                                                           |     |                                                                                                               |               |
| 44 |                                                           |     |                                                                                                               |               |
| 45 |                                                           |     |                                                                                                               |               |
| 46 |                                                           |     |                                                                                                               |               |

1 Sample size 14 Estimated number of participants needed to achieve study objectives and how it was determined, including \_\_\_\_\_7\_\_\_\_\_

2 clinical and statistical assumptions supporting any sample size calculations

3  
4 Recruitment 15 Strategies for achieving adequate participant enrolment to reach target sample size \_\_\_\_\_9\_\_\_\_\_

5  
6 **Methods: Assignment of interventions (for controlled trials)**

7  
8 Allocation:

9  
10 Sequence 16a Method of generating the allocation sequence (eg, computer-generated random numbers), and list of any \_\_\_\_\_9\_\_\_\_\_

11 generation

12 factors for stratification. To reduce predictability of a random sequence, details of any planned restriction  
13 (eg, blocking) should be provided in a separate document that is unavailable to those who enrol participants  
14 or assign interventions

15  
16 Allocation 16b Mechanism of implementing the allocation sequence (eg, central telephone; sequentially numbered, \_\_\_\_\_9\_\_\_\_\_

17 concealment  
18 mechanism

19 opaque, sealed envelopes), describing any steps to conceal the sequence until interventions are assigned

20  
21 Implementation 16c Who will generate the allocation sequence, who will enrol participants, and who will assign participants to \_\_\_\_\_9\_\_\_\_\_

22 interventions

23  
24 Blinding (masking) 17a Who will be blinded after assignment to interventions (eg, trial participants, care providers, outcome \_\_\_\_\_9\_\_\_\_\_

25 assessors, data analysts), and how

26  
27 17b If blinded, circumstances under which unblinding is permissible, and procedure for revealing a participant's \_\_\_\_\_9\_\_\_\_\_

28 allocated intervention during the trial

29  
30  
31 **Methods: Data collection, management, and analysis**

32  
33 Data collection 18a Plans for assessment and collection of outcome, baseline, and other trial data, including any related \_\_\_\_\_9-10\_

34 methods

35 processes to promote data quality (eg, duplicate measurements, training of assessors) and a description of  
36 study instruments (eg, questionnaires, laboratory tests) along with their reliability and validity, if known.  
37 Reference to where data collection forms can be found, if not in the protocol

38  
39 18b Plans to promote participant retention and complete follow-up, including list of any outcome data to be \_\_\_\_\_

40 collected for participants who discontinue or deviate from intervention protocols

|    |                                 |     |                                                                                                                                                                                                                                                                                                                                       |                 |
|----|---------------------------------|-----|---------------------------------------------------------------------------------------------------------------------------------------------------------------------------------------------------------------------------------------------------------------------------------------------------------------------------------------|-----------------|
| 1  | Data management                 | 19  | Plans for data entry, coding, security, and storage, including any related processes to promote data quality (eg, double data entry; range checks for data values). Reference to where details of data management procedures can be found, if not in the protocol                                                                     | _____ N/A _____ |
| 2  |                                 |     |                                                                                                                                                                                                                                                                                                                                       |                 |
| 3  |                                 |     |                                                                                                                                                                                                                                                                                                                                       |                 |
| 4  |                                 |     |                                                                                                                                                                                                                                                                                                                                       |                 |
| 5  | Statistical methods             | 20a | Statistical methods for analysing primary and secondary outcomes. Reference to where other details of the statistical analysis plan can be found, if not in the protocol                                                                                                                                                              | _____ 10 _____  |
| 6  |                                 |     |                                                                                                                                                                                                                                                                                                                                       |                 |
| 7  |                                 |     |                                                                                                                                                                                                                                                                                                                                       |                 |
| 8  |                                 | 20b | Methods for any additional analyses (eg, subgroup and adjusted analyses)                                                                                                                                                                                                                                                              | _____ 10 _____  |
| 9  |                                 |     |                                                                                                                                                                                                                                                                                                                                       |                 |
| 10 |                                 | 20c | Definition of analysis population relating to protocol non-adherence (eg, as randomised analysis), and any statistical methods to handle missing data (eg, multiple imputation)                                                                                                                                                       | _____ 10 _____  |
| 11 |                                 |     |                                                                                                                                                                                                                                                                                                                                       |                 |
| 12 |                                 |     |                                                                                                                                                                                                                                                                                                                                       |                 |
| 13 |                                 |     |                                                                                                                                                                                                                                                                                                                                       |                 |
| 14 | <b>Methods: Monitoring</b>      |     |                                                                                                                                                                                                                                                                                                                                       |                 |
| 15 |                                 |     |                                                                                                                                                                                                                                                                                                                                       |                 |
| 16 | Data monitoring                 | 21a | Composition of data monitoring committee (DMC); summary of its role and reporting structure; statement of whether it is independent from the sponsor and competing interests; and reference to where further details about its charter can be found, if not in the protocol. Alternatively, an explanation of why a DMC is not needed | _____ N/A _____ |
| 17 |                                 |     |                                                                                                                                                                                                                                                                                                                                       |                 |
| 18 |                                 |     |                                                                                                                                                                                                                                                                                                                                       |                 |
| 19 |                                 |     |                                                                                                                                                                                                                                                                                                                                       |                 |
| 20 |                                 |     |                                                                                                                                                                                                                                                                                                                                       |                 |
| 21 |                                 |     |                                                                                                                                                                                                                                                                                                                                       |                 |
| 22 |                                 | 21b | Description of any interim analyses and stopping guidelines, including who will have access to these interim results and make the final decision to terminate the trial                                                                                                                                                               | _____ N/A _____ |
| 23 |                                 |     |                                                                                                                                                                                                                                                                                                                                       |                 |
| 24 |                                 |     |                                                                                                                                                                                                                                                                                                                                       |                 |
| 25 | Harms                           | 22  | Plans for collecting, assessing, reporting, and managing solicited and spontaneously reported adverse events and other unintended effects of trial interventions or trial conduct                                                                                                                                                     | _____ N/A _____ |
| 26 |                                 |     |                                                                                                                                                                                                                                                                                                                                       |                 |
| 27 |                                 |     |                                                                                                                                                                                                                                                                                                                                       |                 |
| 28 | Auditing                        | 23  | Frequency and procedures for auditing trial conduct, if any, and whether the process will be independent from investigators and the sponsor                                                                                                                                                                                           | _____ N/A _____ |
| 29 |                                 |     |                                                                                                                                                                                                                                                                                                                                       |                 |
| 30 |                                 |     |                                                                                                                                                                                                                                                                                                                                       |                 |
| 31 |                                 |     |                                                                                                                                                                                                                                                                                                                                       |                 |
| 32 | <b>Ethics and dissemination</b> |     |                                                                                                                                                                                                                                                                                                                                       |                 |
| 33 |                                 |     |                                                                                                                                                                                                                                                                                                                                       |                 |
| 34 | Research ethics approval        | 24  | Plans for seeking research ethics committee/institutional review board (REC/IRB) approval                                                                                                                                                                                                                                             | _____ 10 _____  |
| 35 |                                 |     |                                                                                                                                                                                                                                                                                                                                       |                 |
| 36 |                                 |     |                                                                                                                                                                                                                                                                                                                                       |                 |
| 37 | Protocol amendments             | 25  | Plans for communicating important protocol modifications (eg, changes to eligibility criteria, outcomes, analyses) to relevant parties (eg, investigators, REC/IRBs, trial participants, trial registries, journals, regulators)                                                                                                      | _____ N/A _____ |
| 38 |                                 |     |                                                                                                                                                                                                                                                                                                                                       |                 |
| 39 |                                 |     |                                                                                                                                                                                                                                                                                                                                       |                 |
| 40 |                                 |     |                                                                                                                                                                                                                                                                                                                                       |                 |
| 41 |                                 |     |                                                                                                                                                                                                                                                                                                                                       |                 |
| 42 |                                 |     |                                                                                                                                                                                                                                                                                                                                       |                 |

|    |                               |     |                                                                                                                                                                                                                                                                                     |              |
|----|-------------------------------|-----|-------------------------------------------------------------------------------------------------------------------------------------------------------------------------------------------------------------------------------------------------------------------------------------|--------------|
| 1  | Consent or assent             | 26a | Who will obtain informed consent or assent from potential trial participants or authorised surrogates, and how (see Item 32)                                                                                                                                                        | _____5_____  |
| 2  |                               |     |                                                                                                                                                                                                                                                                                     |              |
| 3  |                               |     |                                                                                                                                                                                                                                                                                     |              |
| 4  |                               | 26b | Additional consent provisions for collection and use of participant data and biological specimens in ancillary studies, if applicable                                                                                                                                               | ____N/A_____ |
| 5  |                               |     |                                                                                                                                                                                                                                                                                     |              |
| 6  |                               |     |                                                                                                                                                                                                                                                                                     |              |
| 7  | Confidentiality               | 27  | How personal information about potential and enrolled participants will be collected, shared, and maintained in order to protect confidentiality before, during, and after the trial                                                                                                | _____5_____  |
| 8  |                               |     |                                                                                                                                                                                                                                                                                     |              |
| 9  |                               |     |                                                                                                                                                                                                                                                                                     |              |
| 10 | Declaration of interests      | 28  | Financial and other competing interests for principal investigators for the overall trial and each study site                                                                                                                                                                       | ____11_____  |
| 11 |                               |     |                                                                                                                                                                                                                                                                                     |              |
| 12 |                               |     |                                                                                                                                                                                                                                                                                     |              |
| 13 | Access to data                | 29  | Statement of who will have access to the final trial dataset, and disclosure of contractual agreements that limit such access for investigators                                                                                                                                     | ____N/A_____ |
| 14 |                               |     |                                                                                                                                                                                                                                                                                     |              |
| 15 |                               |     |                                                                                                                                                                                                                                                                                     |              |
| 16 | Ancillary and post-trial care | 30  | Provisions, if any, for ancillary and post-trial care, and for compensation to those who suffer harm from trial participation                                                                                                                                                       | ____N/A_____ |
| 17 |                               |     |                                                                                                                                                                                                                                                                                     |              |
| 18 |                               |     |                                                                                                                                                                                                                                                                                     |              |
| 19 |                               |     |                                                                                                                                                                                                                                                                                     |              |
| 20 | Dissemination policy          | 31a | Plans for investigators and sponsor to communicate trial results to participants, healthcare professionals, the public, and other relevant groups (eg, via publication, reporting in results databases, or other data sharing arrangements), including any publication restrictions | ____11_____  |
| 21 |                               |     |                                                                                                                                                                                                                                                                                     |              |
| 22 |                               |     |                                                                                                                                                                                                                                                                                     |              |
| 23 |                               |     |                                                                                                                                                                                                                                                                                     |              |
| 24 |                               | 31b | Authorship eligibility guidelines and any intended use of professional writers                                                                                                                                                                                                      | ____11_____  |
| 25 |                               |     |                                                                                                                                                                                                                                                                                     |              |
| 26 |                               | 31c | Plans, if any, for granting public access to the full protocol, participant-level dataset, and statistical code                                                                                                                                                                     | ____N/A_____ |
| 27 |                               |     |                                                                                                                                                                                                                                                                                     |              |
| 28 |                               |     |                                                                                                                                                                                                                                                                                     |              |
| 29 | <b>Appendices</b>             |     |                                                                                                                                                                                                                                                                                     |              |
| 30 |                               |     |                                                                                                                                                                                                                                                                                     |              |
| 31 | Informed consent materials    | 32  | Model consent form and other related documentation given to participants and authorised surrogates                                                                                                                                                                                  | ____N/A_____ |
| 32 |                               |     |                                                                                                                                                                                                                                                                                     |              |
| 33 |                               |     |                                                                                                                                                                                                                                                                                     |              |
| 34 | Biological specimens          | 33  | Plans for collection, laboratory evaluation, and storage of biological specimens for genetic or molecular analysis in the current trial and for future use in ancillary studies, if applicable                                                                                      | ____N/A_____ |
| 35 |                               |     |                                                                                                                                                                                                                                                                                     |              |
| 36 |                               |     |                                                                                                                                                                                                                                                                                     |              |

\*It is strongly recommended that this checklist be read in conjunction with the SPIRIT 2013 Explanation & Elaboration for important clarification on the items. Amendments to the protocol should be tracked and dated. The SPIRIT checklist is copyrighted by the SPIRIT Group under the Creative Commons [“Attribution-NonCommercial-NoDerivs 3.0 Unported”](https://creativecommons.org/licenses/by-nc-nd/3.0/) license.

# BMJ Open

## Enhancing peer-support experience for patients discharged from acute psychiatric care: Protocol for a randomized controlled pilot trial

|                                 |                                                                                                                                                                                                                                                                                                                                                                                                                                                                                                                                                                                                                                                                                                                                                                                                                                                                                                                                                                                                                                                                                                                                                                                                                                                                                                                                                                                                                                                                                                                                                                                                                                                                                                                                                                                                                                                                                                                                                                                                                                                                                                                                                                              |
|---------------------------------|------------------------------------------------------------------------------------------------------------------------------------------------------------------------------------------------------------------------------------------------------------------------------------------------------------------------------------------------------------------------------------------------------------------------------------------------------------------------------------------------------------------------------------------------------------------------------------------------------------------------------------------------------------------------------------------------------------------------------------------------------------------------------------------------------------------------------------------------------------------------------------------------------------------------------------------------------------------------------------------------------------------------------------------------------------------------------------------------------------------------------------------------------------------------------------------------------------------------------------------------------------------------------------------------------------------------------------------------------------------------------------------------------------------------------------------------------------------------------------------------------------------------------------------------------------------------------------------------------------------------------------------------------------------------------------------------------------------------------------------------------------------------------------------------------------------------------------------------------------------------------------------------------------------------------------------------------------------------------------------------------------------------------------------------------------------------------------------------------------------------------------------------------------------------------|
| Journal:                        | <i>BMJ Open</i>                                                                                                                                                                                                                                                                                                                                                                                                                                                                                                                                                                                                                                                                                                                                                                                                                                                                                                                                                                                                                                                                                                                                                                                                                                                                                                                                                                                                                                                                                                                                                                                                                                                                                                                                                                                                                                                                                                                                                                                                                                                                                                                                                              |
| Manuscript ID                   | bmjopen-2018-022433.R1                                                                                                                                                                                                                                                                                                                                                                                                                                                                                                                                                                                                                                                                                                                                                                                                                                                                                                                                                                                                                                                                                                                                                                                                                                                                                                                                                                                                                                                                                                                                                                                                                                                                                                                                                                                                                                                                                                                                                                                                                                                                                                                                                       |
| Article Type:                   | Protocol                                                                                                                                                                                                                                                                                                                                                                                                                                                                                                                                                                                                                                                                                                                                                                                                                                                                                                                                                                                                                                                                                                                                                                                                                                                                                                                                                                                                                                                                                                                                                                                                                                                                                                                                                                                                                                                                                                                                                                                                                                                                                                                                                                     |
| Date Submitted by the Author:   | 22-May-2018                                                                                                                                                                                                                                                                                                                                                                                                                                                                                                                                                                                                                                                                                                                                                                                                                                                                                                                                                                                                                                                                                                                                                                                                                                                                                                                                                                                                                                                                                                                                                                                                                                                                                                                                                                                                                                                                                                                                                                                                                                                                                                                                                                  |
| Complete List of Authors:       | <p>Urichuk, Liana; Alberta Health Services, Addiction and Mental Health; University of Alberta Faculty of Medicine and Dentistry, Department of Psychiatry</p> <p>Hrabok, Marianne; Alberta Health Services, Addiction and Mental Health; University of Alberta Faculty of Medicine and Dentistry, Department of Psychiatry</p> <p>Hay, Katherine; Alberta Health Services, Addiction and Mental Health</p> <p>Spurvey, Pamela; Alberta Health Services, Addiction and Mental Health</p> <p>Sosdjan, Daniella; Alberta Health Services, Addiction and Mental Health</p> <p>Knox, Michelle; Alberta Health Services, Addiction and Mental Health</p> <p>Fu, Allen; University of Alberta Faculty of Medicine and Dentistry, Department of Psychiatry</p> <p>Surood, Shireen; Alberta Health Services, Addiction and Mental Health; University of Calgary, Faculty of Social Work</p> <p>Brown, Robert; Alberta Health Services, Addiction and Mental Health</p> <p>Coulombe, Jeff; Alberta Health Services, Addiction and Mental Health</p> <p>Kelland, Jill; Alberta Health Services, Addiction and Mental Health</p> <p>Rittenbach, Katherine; Alberta Health Services, Addiction and Mental Health; University of Alberta Faculty of Medicine and Dentistry, Department of Psychiatry</p> <p>Snaterse, Mark; Alberta Health Services, Addiction and Mental Health; University of Alberta Faculty of Medicine and Dentistry, Department of Psychiatry</p> <p>Abba-Aji, Adam; Alberta Health Services, Addiction and Mental Health; University of Alberta Faculty of Medicine and Dentistry, Department of Psychiatry</p> <p>Li, Xin-Min; University of Alberta Faculty of Medicine and Dentistry, Department of Psychiatry</p> <p>Chue, Pierre; Alberta Health Services, Addiction and Mental Health; University of Alberta Faculty of Medicine and Dentistry, Department of Psychiatry</p> <p>Greenshaw, Andrew ; University of Alberta Faculty of Medicine and Dentistry, Department of Psychiatry</p> <p>Agyapong , Vincent; Alberta Health Services, Addiction and Mental Health; University of Alberta Faculty of Medicine and Dentistry, Department of Psychiatry</p> |
| <b>Primary Subject Heading</b>: | Evidence based practice                                                                                                                                                                                                                                                                                                                                                                                                                                                                                                                                                                                                                                                                                                                                                                                                                                                                                                                                                                                                                                                                                                                                                                                                                                                                                                                                                                                                                                                                                                                                                                                                                                                                                                                                                                                                                                                                                                                                                                                                                                                                                                                                                      |

1  
2  
3  
4  
5  
6  
7  
8  
9  
10  
11  
12  
13  
14  
15  
16  
17  
18  
19  
20  
21  
22  
23  
24  
25  
26  
27  
28  
29  
30  
31  
32  
33  
34  
35  
36  
37  
38  
39  
40  
41  
42  
43  
44  
45  
46  
47  
48  
49  
50  
51  
52  
53  
54  
55  
56  
57  
58  
59  
60

|                                                                                                                                                         |                                                                                             |
|---------------------------------------------------------------------------------------------------------------------------------------------------------|---------------------------------------------------------------------------------------------|
| Secondary Subject Heading:                                                                                                                              | Mental health, Addiction                                                                    |
| Keywords:                                                                                                                                               | Peer support, supportive text messages, reminder text messages, randomized controlled trial |
| Note: The following files were submitted by the author for peer review, but cannot be converted to PDF. You must view these files (e.g. movies) online. |                                                                                             |
| Peer_Support_Protocol_for_Publication-Revised.docx                                                                                                      |                                                                                             |

SCHOLARONE™  
Manuscripts

For peer review only

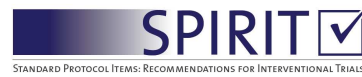

SPIRIT 2013 Checklist: Recommended items to address in a clinical trial protocol and related documents\*

| Section/item                      | Item No | Description                                                                                                                                                                                                                                                                              | Addressed on page number |
|-----------------------------------|---------|------------------------------------------------------------------------------------------------------------------------------------------------------------------------------------------------------------------------------------------------------------------------------------------|--------------------------|
| <b>Administrative information</b> |         |                                                                                                                                                                                                                                                                                          |                          |
| Title                             | 1       | Descriptive title identifying the study design, population, interventions, and, if applicable, trial acronym                                                                                                                                                                             | ___1___                  |
| Trial registration                | 2a      | Trial identifier and registry name. If not yet registered, name of intended registry                                                                                                                                                                                                     | ___1___                  |
|                                   | 2b      | All items from the World Health Organization Trial Registration Data Set                                                                                                                                                                                                                 | ___N/A___                |
| Protocol version                  | 3       | Date and version identifier                                                                                                                                                                                                                                                              | ___N/A___                |
| Funding                           | 4       | Sources and types of financial, material, and other support                                                                                                                                                                                                                              | ___11___                 |
| Roles and responsibilities        | 5a      | Names, affiliations, and roles of protocol contributors                                                                                                                                                                                                                                  | ___1___                  |
|                                   | 5b      | Name and contact information for the trial sponsor                                                                                                                                                                                                                                       | ___11___                 |
|                                   | 5c      | Role of study sponsor and funders, if any, in study design; collection, management, analysis, and interpretation of data; writing of the report; and the decision to submit the report for publication, including whether they will have ultimate authority over any of these activities | ___11___                 |
|                                   | 5d      | Composition, roles, and responsibilities of the coordinating centre, steering committee, endpoint adjudication committee, data management team, and other individuals or groups overseeing the trial, if applicable (see Item 21a for data monitoring committee)                         | ___N/A___                |

1  
2  
3  
4  
5  
6  
7  
8  
9  
10  
11  
12  
13  
14  
15  
16  
17  
18  
19  
20  
21  
22  
23  
24  
25  
26  
27  
28  
29  
30  
31  
32  
33  
34  
35  
36  
37  
38  
39  
40  
41  
42  
43  
44  
45  
46  
47

**Introduction**

|                          |    |                                                                                                                                                                                                           |     |
|--------------------------|----|-----------------------------------------------------------------------------------------------------------------------------------------------------------------------------------------------------------|-----|
| Background and rationale | 6a | Description of research question and justification for undertaking the trial, including summary of relevant studies (published and unpublished) examining benefits and harms for each intervention        | 2-5 |
|                          | 6b | Explanation for choice of comparators                                                                                                                                                                     | 7   |
| Objectives               | 7  | Specific objectives or hypotheses                                                                                                                                                                         | 5   |
| Trial design             | 8  | Description of trial design including type of trial (eg, parallel group, crossover, factorial, single group), allocation ratio, and framework (eg, superiority, equivalence, noninferiority, exploratory) | 5   |

**Methods: Participants, interventions, and outcomes**

|                      |     |                                                                                                                                                                                                                                                                                                                                                                                |     |
|----------------------|-----|--------------------------------------------------------------------------------------------------------------------------------------------------------------------------------------------------------------------------------------------------------------------------------------------------------------------------------------------------------------------------------|-----|
| Study setting        | 9   | Description of study settings (eg, community clinic, academic hospital) and list of countries where data will be collected. Reference to where list of study sites can be obtained                                                                                                                                                                                             | 5   |
| Eligibility criteria | 10  | Inclusion and exclusion criteria for participants. If applicable, eligibility criteria for study centres and individuals who will perform the interventions (eg, surgeons, psychotherapists)                                                                                                                                                                                   | 5   |
| Interventions        | 11a | Interventions for each group with sufficient detail to allow replication, including how and when they will be administered                                                                                                                                                                                                                                                     | 7   |
|                      | 11b | Criteria for discontinuing or modifying allocated interventions for a given trial participant (eg, drug dose change in response to harms, participant request, or improving/worsening disease)                                                                                                                                                                                 | N/A |
|                      | 11c | Strategies to improve adherence to intervention protocols, and any procedures for monitoring adherence (eg, drug tablet return, laboratory tests)                                                                                                                                                                                                                              | 9   |
|                      | 11d | Relevant concomitant care and interventions that are permitted or prohibited during the trial                                                                                                                                                                                                                                                                                  | N/A |
| Outcomes             | 12  | Primary, secondary, and other outcomes, including the specific measurement variable (eg, systolic blood pressure), analysis metric (eg, change from baseline, final value, time to event), method of aggregation (eg, median, proportion), and time point for each outcome. Explanation of the clinical relevance of chosen efficacy and harm outcomes is strongly recommended | 7-9 |
| Participant timeline | 13  | Time schedule of enrolment, interventions (including any run-ins and washouts), assessments, and visits for participants. A schematic diagram is highly recommended (see Figure)                                                                                                                                                                                               | 7-9 |



1  
2  
3 Sample size 14 Estimated number of participants needed to achieve study objectives and how it was determined, including \_\_\_\_\_7\_\_\_\_\_

4 clinical and statistical assumptions supporting any sample size calculations  
5  
6 Recruitment 15 Strategies for achieving adequate participant enrolment to reach target sample size \_\_\_\_\_9\_\_\_\_\_

7  
8 **Methods: Assignment of interventions (for controlled trials)**

9  
10 Allocation:

11 Sequence generation 16a Method of generating the allocation sequence (eg, computer-generated random numbers), and list of any \_\_\_\_\_9\_\_\_\_\_

12 factors for stratification. To reduce predictability of a random sequence, details of any planned restriction  
13 (eg, blocking) should be provided in a separate document that is unavailable to those who enrol participants  
14 or assign interventions  
15  
16 Allocation concealment mechanism 16b Mechanism of implementing the allocation sequence (eg, central telephone; sequentially numbered, \_\_\_\_\_9\_\_\_\_\_

17 opaque, sealed envelopes), describing any steps to conceal the sequence until interventions are assigned  
18  
19 Implementation 16c Who will generate the allocation sequence, who will enrol participants, and who will assign participants to \_\_\_\_\_9\_\_\_\_\_

20  
21 Blinding (masking) 17a Who will be blinded after assignment to interventions (eg, trial participants, care providers, outcome \_\_\_\_\_9\_\_\_\_\_

22 assessors, data analysts), and how  
23  
24 17b If blinded, circumstances under which unblinding is permissible, and procedure for revealing a participant's \_\_\_\_\_9\_\_\_\_\_

25  
26  
27  
28  
29  
30  
31 **Methods: Data collection, management, and analysis**

32  
33 Data collection methods 18a Plans for assessment and collection of outcome, baseline, and other trial data, including any related \_\_\_\_\_9-10\_

34 processes to promote data quality (eg, duplicate measurements, training of assessors) and a description of  
35 study instruments (eg, questionnaires, laboratory tests) along with their reliability and validity, if known.  
36 Reference to where data collection forms can be found, if not in the protocol  
37  
38 18b Plans to promote participant retention and complete follow-up, including list of any outcome data to be \_\_\_\_\_

39 collected for participants who discontinue or deviate from intervention protocols  
40  
41  
42  
43  
44  
45  
46  
47

1  
2  
3  
4  
5  
6  
7  
8  
9  
10  
11  
12  
13  
14  
15  
16  
17  
18  
19  
20  
21  
22  
23  
24  
25  
26  
27  
28  
29  
30  
31  
32  
33  
34  
35  
36  
37  
38  
39  
40  
41  
42  
43  
44  
45  
46  
47

|                                 |     |                                                                                                                                                                                                                                                                                                                                       |                 |
|---------------------------------|-----|---------------------------------------------------------------------------------------------------------------------------------------------------------------------------------------------------------------------------------------------------------------------------------------------------------------------------------------|-----------------|
| Data management                 | 19  | Plans for data entry, coding, security, and storage, including any related processes to promote data quality (eg, double data entry; range checks for data values). Reference to where details of data management procedures can be found, if not in the protocol                                                                     | _____ N/A _____ |
| Statistical methods             | 20a | Statistical methods for analysing primary and secondary outcomes. Reference to where other details of the statistical analysis plan can be found, if not in the protocol                                                                                                                                                              | _____ 10 _____  |
|                                 | 20b | Methods for any additional analyses (eg, subgroup and adjusted analyses)                                                                                                                                                                                                                                                              | _____ 10 _____  |
|                                 | 20c | Definition of analysis population relating to protocol non-adherence (eg, as randomised analysis), and any statistical methods to handle missing data (eg, multiple imputation)                                                                                                                                                       | _____ 10 _____  |
| <b>Methods: Monitoring</b>      |     |                                                                                                                                                                                                                                                                                                                                       |                 |
| Data monitoring                 | 21a | Composition of data monitoring committee (DMC); summary of its role and reporting structure; statement of whether it is independent from the sponsor and competing interests; and reference to where further details about its charter can be found, if not in the protocol. Alternatively, an explanation of why a DMC is not needed | _____ N/A _____ |
|                                 | 21b | Description of any interim analyses and stopping guidelines, including who will have access to these interim results and make the final decision to terminate the trial                                                                                                                                                               | _____ N/A _____ |
| Harms                           | 22  | Plans for collecting, assessing, reporting, and managing solicited and spontaneously reported adverse events and other unintended effects of trial interventions or trial conduct                                                                                                                                                     | _____ N/A _____ |
| Auditing                        | 23  | Frequency and procedures for auditing trial conduct, if any, and whether the process will be independent from investigators and the sponsor                                                                                                                                                                                           | _____ N/A _____ |
| <b>Ethics and dissemination</b> |     |                                                                                                                                                                                                                                                                                                                                       |                 |
| Research ethics approval        | 24  | Plans for seeking research ethics committee/institutional review board (REC/IRB) approval                                                                                                                                                                                                                                             | _____ 10 _____  |
| Protocol amendments             | 25  | Plans for communicating important protocol modifications (eg, changes to eligibility criteria, outcomes, analyses) to relevant parties (eg, investigators, REC/IRBs, trial participants, trial registries, journals, regulators)                                                                                                      | _____ N/A _____ |

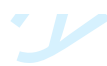

|    |                               |     |                                                                                                                                                                                                                                                                                     |               |
|----|-------------------------------|-----|-------------------------------------------------------------------------------------------------------------------------------------------------------------------------------------------------------------------------------------------------------------------------------------|---------------|
| 1  |                               |     |                                                                                                                                                                                                                                                                                     |               |
| 2  |                               |     |                                                                                                                                                                                                                                                                                     |               |
| 3  | Consent or assent             | 26a | Who will obtain informed consent or assent from potential trial participants or authorised surrogates, and how (see Item 32)                                                                                                                                                        | _____5_____   |
| 4  |                               |     |                                                                                                                                                                                                                                                                                     |               |
| 5  |                               |     |                                                                                                                                                                                                                                                                                     |               |
| 6  |                               | 26b | Additional consent provisions for collection and use of participant data and biological specimens in ancillary studies, if applicable                                                                                                                                               | _____N/A_____ |
| 7  |                               |     |                                                                                                                                                                                                                                                                                     |               |
| 8  | Confidentiality               | 27  | How personal information about potential and enrolled participants will be collected, shared, and maintained in order to protect confidentiality before, during, and after the trial                                                                                                | _____5_____   |
| 9  |                               |     |                                                                                                                                                                                                                                                                                     |               |
| 10 |                               |     |                                                                                                                                                                                                                                                                                     |               |
| 11 | Declaration of interests      | 28  | Financial and other competing interests for principal investigators for the overall trial and each study site                                                                                                                                                                       | _____11_____  |
| 12 |                               |     |                                                                                                                                                                                                                                                                                     |               |
| 13 |                               |     |                                                                                                                                                                                                                                                                                     |               |
| 14 | Access to data                | 29  | Statement of who will have access to the final trial dataset, and disclosure of contractual agreements that limit such access for investigators                                                                                                                                     | _____N/A_____ |
| 15 |                               |     |                                                                                                                                                                                                                                                                                     |               |
| 16 |                               |     |                                                                                                                                                                                                                                                                                     |               |
| 17 | Ancillary and post-trial care | 30  | Provisions, if any, for ancillary and post-trial care, and for compensation to those who suffer harm from trial participation                                                                                                                                                       | _____N/A_____ |
| 18 |                               |     |                                                                                                                                                                                                                                                                                     |               |
| 19 |                               |     |                                                                                                                                                                                                                                                                                     |               |
| 20 | Dissemination policy          | 31a | Plans for investigators and sponsor to communicate trial results to participants, healthcare professionals, the public, and other relevant groups (eg, via publication, reporting in results databases, or other data sharing arrangements), including any publication restrictions | _____11_____  |
| 21 |                               |     |                                                                                                                                                                                                                                                                                     |               |
| 22 |                               |     |                                                                                                                                                                                                                                                                                     |               |
| 23 |                               |     |                                                                                                                                                                                                                                                                                     |               |
| 24 |                               |     |                                                                                                                                                                                                                                                                                     |               |
| 25 |                               | 31b | Authorship eligibility guidelines and any intended use of professional writers                                                                                                                                                                                                      | _____11_____  |
| 26 |                               |     |                                                                                                                                                                                                                                                                                     |               |
| 27 |                               | 31c | Plans, if any, for granting public access to the full protocol, participant-level dataset, and statistical code                                                                                                                                                                     | _____N/A_____ |
| 28 |                               |     |                                                                                                                                                                                                                                                                                     |               |
| 29 | <b>Appendices</b>             |     |                                                                                                                                                                                                                                                                                     |               |
| 30 |                               |     |                                                                                                                                                                                                                                                                                     |               |
| 31 | Informed consent materials    | 32  | Model consent form and other related documentation given to participants and authorised surrogates                                                                                                                                                                                  | _____N/A_____ |
| 32 |                               |     |                                                                                                                                                                                                                                                                                     |               |
| 33 |                               |     |                                                                                                                                                                                                                                                                                     |               |
| 34 | Biological specimens          | 33  | Plans for collection, laboratory evaluation, and storage of biological specimens for genetic or molecular analysis in the current trial and for future use in ancillary studies, if applicable                                                                                      | _____N/A_____ |
| 35 |                               |     |                                                                                                                                                                                                                                                                                     |               |
| 36 |                               |     |                                                                                                                                                                                                                                                                                     |               |

37 \*It is strongly recommended that this checklist be read in conjunction with the SPIRIT 2013 Explanation & Elaboration for important clarification on the items.  
 38 Amendments to the protocol should be tracked and dated. The SPIRIT checklist is copyrighted by the SPIRIT Group under the Creative Commons  
 39 "[Attribution-NonCommercial-NoDerivs 3.0 Unported](https://creativecommons.org/licenses/by-nc-nd/3.0/)" license.  
 40
